# Supplementary material for: Clustering of Drosophila housekeeping promoters facilitates their expression
Source: PubMed Central journal article supplement — Genome Res. 2017 Jul;27(7):1153–61. doi: 10.1101/gr.211433.116 (PMC5495067; doi:10.1101/gr.211433.116), 2017-07
Supplement: supp_gr.211433.116_Supplemental_Fig_S4.pdf [file supp_gr.211433.116_Supplemental_Fig_S4.pdf]

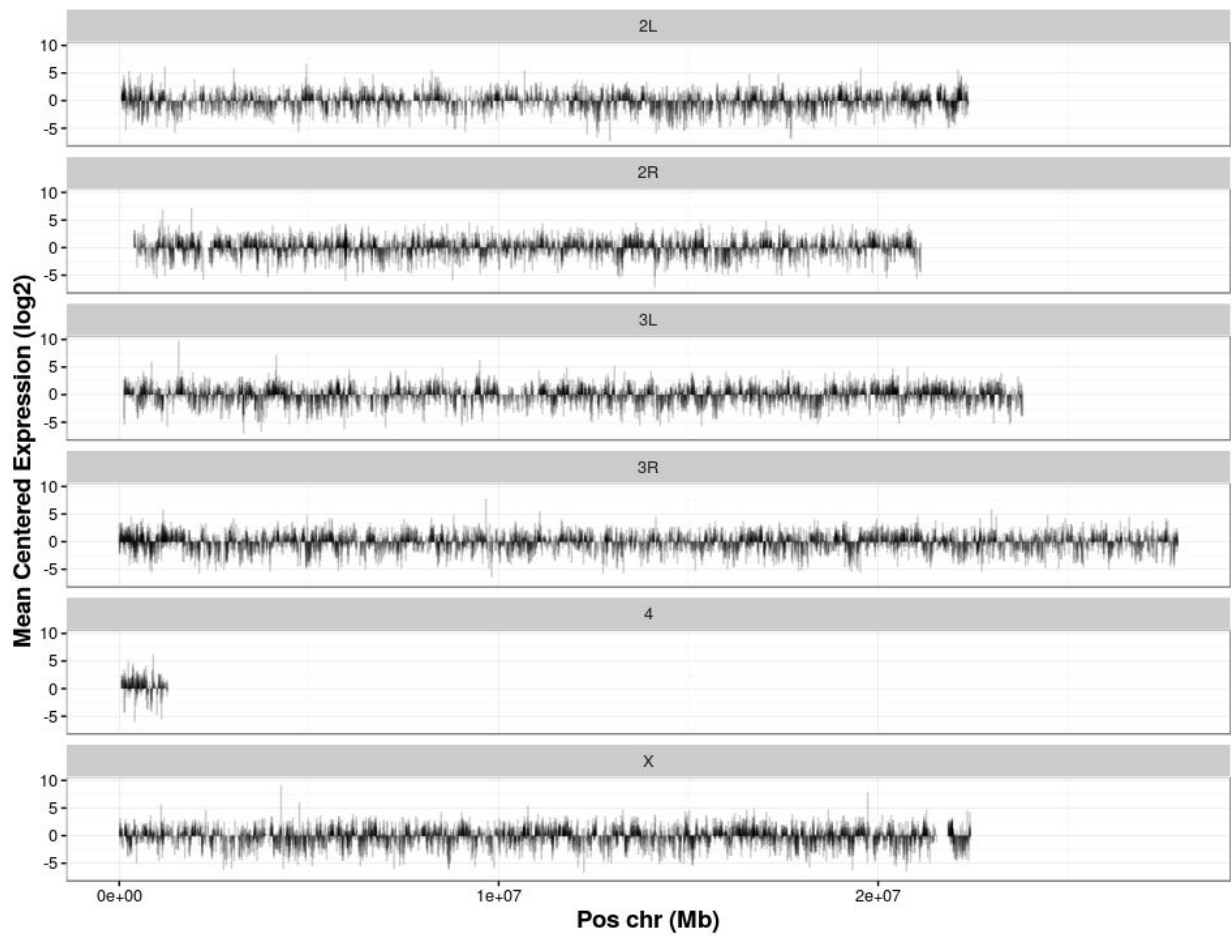

**Supplemental Figure S4. Genome-wide expression landscape of integrated reporter II.** Each of the stacked panels corresponds to one of the *Drosophila melanogaster* chromosomes. Each bar represents a barcoded integrated reporter II, and its height corresponds to the log<sub>2</sub>, mean-centered expression of the reporter. The expression fluctuates in domains with nominal size 100 kb.
