# Supplementary material for: Clustering of Drosophila housekeeping promoters facilitates their expression
Source: PubMed Central journal article supplement — Genome Res. 2017 Jul;27(7):1153–61. doi: 10.1101/gr.211433.116 (PMC5495067; doi:10.1101/gr.211433.116), 2017-07
Supplement: supp_gr.211433.116_Supplemental_Fig_S8.pdf [file supp_gr.211433.116_Supplemental_Fig_S8.pdf]

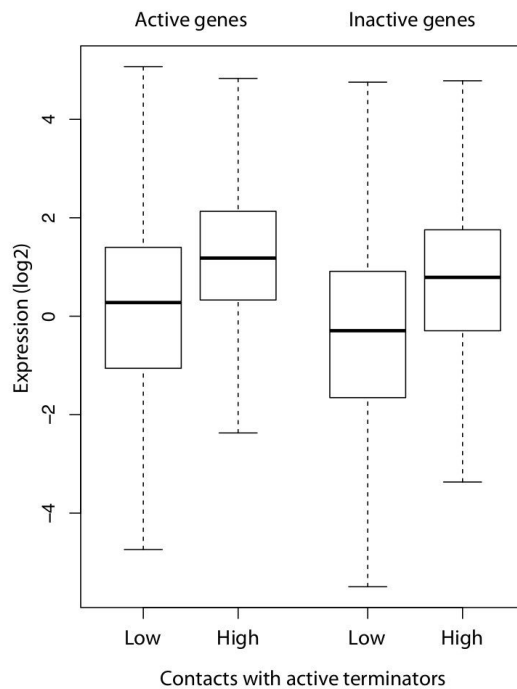

**Supplemental Figure S8. Contacts with active terminators act regardless the expression of endogenous genes.** The box plots represent the expression of reporters inserted in genes, separated by the expression level of this gene (active or inactive) and by the contact frequency with active terminators (higher or lower than average). Reporters inserted in active genes are generally expressed at higher level than reporters inserted in inactive genes. Higher than average contact frequency with active terminators increases the expression of the reporters in all contexts (Wilcoxon-Mann-Whitney test  $p < 2.2 \cdot 10^{-16}$ ).
