# Supplementary material for: Clustering of Drosophila housekeeping promoters facilitates their expression
Source: HighWire-hosted journal article supplement (doi:10.1101/gr.211433.116), 2017-04-18
Supplement: Supplemental_Table_S3.xlsx [file Supplemental_Table_S3.xlsx]

## Sheet: Sheet1
Top 100 motifs present at promoters and terminators of expressed genes, ranked by abundance in each category. Fimo from the MEME suite was used against all the terminator sequences (defined as the +/- 200 bp around the TTS) and promoters (defined as 500 bp upstream and 50 bp downstream of each TSS). The database On the Fly 2014 was used for the TF position weight matrices.
Rank	Terminator motifs	Promoter motifs
1	GGGGGGGGGGGGGGGTTAGT	GTGGGGGGGGGGGGCATTGT
2	CCCACACCAGGACCCCACCCCAC	GCAGGTGCATGGGGG
3	GCAGGTGCATGGGGG	ATGTCAAGCCCAAGCCCAAACCC
4	TTGGGGGGGGGGGGGTATAT	CAAACAAAAAAAACCCCACACA
5	CAAACAAAAAAAACCCCACACA	CCCACAAAAAAAAACCGAAAAA
6	CACGGAAAATTCCCA	CAGACAAAAAAACCAACCAACA
7	GCTACACAAAAAAAAA	GGGCGCGTTCTGGTTGGCAACG
8	AACACAAAAAAAACGACAAAAA	GGGGGGGGGGGGGGGATGGT
9	ACGTCGCCAGGACCCATCCAGGA	GGGGGGGGGGGGGGGAACGT
10	GGGGGGGGGGGGGGGAAAGA	ACTACACAAAAAAAAC
11	GGGGGGGGGGGGGGGCTACT	GGGGGGGGGGGGGGGAAAGA
12	CCACATGGCATGGCCACAA	GGGGGGGGGGGGGGGGAAAG
13	GGGGGGGGGGGGGGGGAAAG	GGGGGGGGGGGGGGGGTTCT
14	GGGGGGGGGGGAGGGAAACT	GGGGGGGGGGGGGGGTTAAA
15	GAGGGGGGGGGGGGGTGAAT	AACGCAAAAAAAACAGGAAAAA
16	CACACAAAAAAAACAAACACAC	GGTGGTCGGCTAGTTGGCAACG
17	TTGTCAACAGCAAACACCACCGA	CAGGGCTGCACAACCACC
18	CAAACAAAAAAACACCCACAAA	GGGGGGGGGGGGGGTTAAAT
19	GTGGAGGGGGGGGGGATAAC	TCCGTGGGCGTTGC
20	ACAACAAAAAAAACCACACAAA	CCCAGCCACCCAGTAACACCCA
21	GGGGGGGGGGGGGGGTTGAG	GGGGGGGGGGGGGGGGAACG
22	AACACAAAAAAAAAAACAAAAA	GGGGGGGGGGGGGGCATATT
23	GTGGGGGGGGGGGGGGTAGG	TCCGCAAAAAAAAACCCCAACC
24	ATGTCAACCCCCCCCCCCCCCCC	CCAGCGGCACGTGTCGC
25	AAAGCAAAAAAAAAACCCAAAA	TGGGGGGGGGGGGGGCATAT
26	GGGGGGGGGGGTGGGATTGG	GGGGGGGGGGGGGGGGATGG
27	GCTCCACAAAAAAAAA	GGGGGGGGGGGGGGGGTTGG
28	ACCCCCCCCCCC	AACACAAAAAAAAAAACAAAAA
29	GGGGAGGGGGGGGGGTTGGT	GCACCGCAGACAGGGAGGGGAA
30	CGACCCAGGACAAAGAGGGGAA	GTGGGGGGGGGGGGGGTAGG
31	CCCGCAAAAAAAAGAAAACCCA	CACACCGCCAAAGTAATAACAG
32	AACACAAAAAAACGCACAAGAA	GCTTTATAAAAAAAAA
33	TGGGGGGGGGGGGGGTAGGT	CACCCCCACAAAGTAACAGCCA
34	ACAGATGCCACCACCACAA	AGGGGGGGGGGGGGGTTTCT
35	TGGGGGGGGGGGGGGGTTAG	GGGGGGGGGGGGGGGTTGGG
36	GTGCATAAGCTGGTTGGCAACA	GGCCTTGCGGTAGTTGGCAACT
37	GGTGGGCGTGGC	GGGCTGATTAATCGGAGGTGG
38	AACACAAAAAAAAAAAACAAAA	GTTGGGATTAATCATTTGTTG
39	ACTATATAAAAAAAAA	ATAAATCTCGGCACGC
40	AAAAATCAAAGGT	GGGGGGGGGGGTGGGATTGG
41	GCTTAATAAAAAAAAA	CACGCAAAAAAAAAAAAAAACG
42	AGAGCAAAAAAAACCACAAAAG	GGTACATAAAAAAAAA
43	GAGGGGGGGGGGGGAGTAGT	ACCCCCCCCCCC
44	GATACACAAAAAAAAA	CACAGGCAGAGAAAA
45	ACAACAACAACCC	CCGGCGGAAAAACGGAGGGGAA
46	ACAACAACAAGCC	CGACCCAGGACAAAGAGGGGAA
47	ACAACAAAAAAAAAACCAAAAA	GGGTAGACGGTTGTTGGCAACA
48	TGGCTTGGGCTTGTTGGCAACG	GCAGGTGCATGTGCT
49	CCAACAAAAAAAAAACAAAAAA	GCTAACAACACTACCCG
50	GGGAGGGGGGGGGGGTTTGG	GCAGGTGCATGGGTC
51	GCTACACCAAAAAAAA	AAAATTAGAGCAC
52	GGGGGGGGGGGGTGGTTTCG	TGGGGGGGGGGGGGGTAGGT
53	CCAACCTGCAACA	GGGGGGGGGGGGGCCATAGT
54	GGGGGGGGGGGGAGTTAAAT	CCCCCAAAAAACACACACAAAA
55	CCAACAAAAAAAAACAACAAAA	GGTGGGCGTGGC
56	AAAAATCACAGCACCC	CTGTTGCCGCCGGTTGGCAACG
57	CCAACAAAAAACCCAGCCACAA	AACACAAAAAAAAAAAACAAAA
58	ACTTTATAAAAAAAAA	ACTATATAAAAAAAAA
59	CCAGCGAGGACAGGAAGGGGAA	CACAGCACCTGCGCC
60	ACCCCCCCCCTC	AAAAATCAAAGGT
61	TTGTCAAGCCAAAAAAAAAAAGA	AAGCGACAGACAC
62	ACTAAATAAAAAAAAA	GCTTAATAAAAAAAAA
63	CGCACCACCTGCGCC	GAGGGCTGCATAACACCA
64	GCTACAAAAAAAAAAC	ACAACAACAAGCC
65	AAAAATCAGAGGT	ACAACAACAACCC
66	CAAACAAAAAAAAAACAACACA	GGGGCAGGTAGG
67	CAAGCAAAAAAAAAAAACAAAA	TTCATGGGCGTTGC
68	AAGAATGTCCCC	CCAACAAAAAAAAAACAAAAAA
69	AAGTCAACCCCAAAAAGAACTCA	GCCACACAAAAAAAAA
70	ACCGCAAAAAACGAACCCCAAA	AGCACAAAAAAAACAAAAACAA
71	AAAACAAAAAAAAAAACCAACA	GGGGGGGGGGGGGGCCATAG
72	AACACAAAAAAAGCCCAACAAT	TCGTGCAAAGTAGTTGGCAACG
73	GGGGGGGGGGAGGGGGTTGG	CAAACAAAAAAAACAAGAACAA
74	GGGGGGGGGGGGAGGCATGG	CATACAAAAAAAAACCCCCACC
75	AATGCAAAAAAAGGCCCCAAAA	CCAACCTGCAACA
76	ATCACAAAAAAAAAACACAAAA	CACACAAAAAAAAAAAACAACT
77	AAAATTAGGGCAC	GGGGGGGGGGGGAGTTAAAT
78	GGTATATAAAAAAAAA	CTCTGGCCAGGACCTTTCCACCC
79	TATAGTTTTATTGC	TTGGGGGGGGGGGGGTTTAA
80	AAAACAAAAAAAAAACACAAAA	ACCACAAAAAAAAAAAAAAAAA
81	AGCGCAAAAAAAAAAACAACAA	CCAACAAAAAAAAACAACAAAA
82	AACACAAAAAAAAAAACAAGAA	GCAGCAAAAAAACGGCCAAACA
83	TCCCCCCCCCCC	GGTGGGGGGGGGGGGTATGG
84	AGGCCACCAGGACCTCCCACGCA	GGGGGGGGGGGGGTGTTTGG
85	AACGCAAAAAACACCCAAACAT	TGGGGGGGGGGGGGTTTAAG
86	CCCGCAAAAAAACAAAAACAAT	GGGGTGTGTGGGGGGAATAT
87	AATACATAAAAAAAAC	GGGGGGGGGGAGGTGATAAG
88	GGGGGGGGGGAGGGGTTGGG	ACTTTATAAAAAAAAA
89	GGGGGGGGGGG	TACACAAAAAAAACCAACGACG
90	GGGGCGGGGCC	GGAGTCCGTTTCGTTGGCAACG
91	AAAACAAAAAAACCAAACAAAC	TTCCCACCGTTC
92	ACTGCAAAAAAACCAACAAGCA	ACAAACACCTGCGCC
93	TAGGGGGGGGGGGAGTATGT	GGGGTGGGGGGGGGGGTTGG
94	AAAACAAAAAAACCAACCAAGC	ACCCCCCCCCTC
95	AAAGCAAAAAACACACAAAAAG	CACACAAAAAAAAAAAAAAACC
96	GCGACAAAAAAAACAGGCAACA	GGTATACAAAAAAAAA
97	AATACACAAAAAAAAA	CCGACAAAAAACACAACAACAA
98	CCAGCAAAAAAAAAAAAAAAAA	AAAAATCAGAGGT
99	AGCACAAAAAAAAAAAAAAACA	ATGCGACCGGTGGTTGGCAACG
100	TGCTGACTCAGC	GAGGGGGGGGGGGGTTATGG
